# Supplementary material for: Multi-Evaluating Strategy for Siji-kangbingdu Mixture: Chemical Profiling, Fingerprint Characterization, and Quantitative Analysis
Source: PubMed Central journal article supplement (PMC6804210; doi:10.3390/molecules24193545), 2019-09-30
Supplement: molecules-24-03545-s001.pdf [file molecules-24-03545-s001.pdf]

# Multi-evaluating strategy for Siji-kangbingdu Mixture: chemical profiling, fingerprint characterization and quantitative analysis

Zhuoru Yao <sup>1#</sup>, Jingao Yu <sup>1\*#</sup>, Zhishu Tang <sup>1\*</sup>, Hongbo Liu <sup>1\*</sup>, Kaihua Ruan <sup>1</sup>, Zhongxing Song <sup>1</sup>, Yanru Liu <sup>1</sup>, Kun Yan <sup>2</sup>, Yan Liu <sup>2</sup>, Yuping Tang <sup>2</sup> and Huqiang Ma <sup>3</sup>

<sup>1</sup> Shaanxi Collaborative Innovation Center of Chinese Medicine Resources Industrialization/ State Key Laboratory of Research & Development of Characteristic Qin Medicine Resources (Cultivation)/ Shaanxi Innovative Drug Research Center, Shaanxi University of Chinese Medicine, Xianyang, 712000, China; yaozhuoru0708@gmail.com (Z.Y.); rkh15709100891@163.com (K.R.); szx74816@sina.com (Z.S.); 1501011@sntcm.edu.cn (Y.L.).

<sup>2</sup> College of pharmacy, Shaanxi University of Chinese Medicine, Xixian New Area, 712046, China; 18791029030.@139.com (K.Y.); ly712537@163.com (Y.L.); yupingtang9@126.com (Y.T.).

<sup>3</sup> Shaanxi Haitian pharmaceutical co., LTD, Xixian New Area, 712046, China; mahuqiang\_2016@163.com (H.M.)

\* Correspondence: jingao\_yu@sina.cn (J.Y.); or tzs6565@163.com (Z.T.), or 1501010@sntcm.edu.cn (H.L.).

# These authors contributed equally to this work.

**Supplementary information**

**Table S1.** Chemical compounds identified by UPLC-TripleTOF-MS technology coupled with searching algorithms against TCM reference material library.

| NO. | RT<br>(min) | Positive ion mode |                     |                  |       | Negative ion mode |                     |                  |      | Formula      | Identified compound             | Other possible compounds                          | Compound type             |
|-----|-------------|-------------------|---------------------|------------------|-------|-------------------|---------------------|------------------|------|--------------|---------------------------------|---------------------------------------------------|---------------------------|
|     |             | Mass (Da)         | Mass error<br>(ppm) | Library<br>Score | Area  | Mass (Da)         | Mass error<br>(ppm) | Library<br>Score | Area |              |                                 |                                                   |                           |
| 1   | 0.49        | 164.09173         | -4.4                | --               | 490   | --                | --                  | --               | --   | C6H13NO4     | 1-Deoxynojirimycin              | --                                                | other                     |
| 2   | 0.65        | --                | --                  | --               | --    | 191.0197          | 1.2                 | 89.3             | 1481 | C6H8O7       | Citric acid                     | --                                                | Organic acid              |
| 3   | 0.68        | --                | --                  | --               | --    | 827.2674          | 0.2                 | --               | 93   | C30H52O26    | Maltopentaose                   | --                                                | Oligosaccharide           |
| 4   | 0.71        | --                | --                  | --               | --    | 243.0623          | 1.5                 | --               | 57   | C9H12N2O6    | Uridine                         | --                                                | Nucleoside                |
| 5   | 0.72        | 268.10402         | 0.7                 | 99.6             | 24264 | --                | --                  | --               | --   | C10H13N5O4   | Adenosine                       | --                                                | Nucleoside                |
| 6   | 0.75        | 150.09134         | -3.1                | 37.6             | 1829  | --                | --                  | --               | --   | C9H11NO      | 4-<br>Dimethylaminobenzaldehyde | --                                                | other                     |
| 7   | 0.79        | 284.09895         | 0.9                 | 100              | 10979 | 282.0844          | 0.9                 | 99.7             | 66   | C10H13N5O5   | guanosine                       | --                                                | Nucleoside                |
| 8   | 1.34        | 166.08626         | -1.3                | 80               | 30107 | 164.0717          | 1                   | 97.9             | 161  | C9H11NO2     | Phenylalanine                   | --                                                | Amino acid                |
| 9   | 1.37        | 127.03897         | -4.4                | --               | 3773  | --                | --                  | --               | --   | C6H6O3       | 5-Hydroxymethylfurfural         | --                                                | other                     |
| 10  | 2.52        | 195.06518         | -1.6                | --               | 833   | --                | --                  | --               | --   | C10H10O4     | Ferulic Acid                    | Isoferulic acid                                   | Phenolic acid             |
| 11  | 2.53        | 359.13365         | -0.5                | 55.1             | 15690 | --                | --                  | --               | --   | C16H22O9     | sweroside                       | --                                                | other                     |
| 12  | 2.58        | --                | --                  | --               | --    | 375.1297          | 0.8                 | 56.9             | 6263 | C16H24O10    | 8-epiloganic acid               | Vitamin B2, Loganic acid                          | Monoterpene               |
| 13  | 3.08        | --                | --                  | --               | --    | 137.0244          | 0.9                 | 84.3             | 877  | C7H6O3       | Protocatechuic aldehyde         | 4-Hydroxybenzoic acid,<br>salicylic acid, Sesamol | other                     |
| 14  | 3.15        | --                | --                  | --               | --    | 203.0826          | 3                   | 94.7             | 172  | C11H12N2O2   | L-Tryptophan                    | --                                                | Amino acid                |
| 15  | 3.58        | 318.15474         | 0.3                 | 69.7             | 57571 | 345.1191          | 0.8                 | 93.4             | 1694 | C14H20O7.NH3 | Salidroside +NH3                | salidroide+NH3, Aucubin                           | Phenylpropanoid glycoside |
| 16  | 5.88        | 179.03389         | 0.4                 | --               | 1461  | 177.0193          | 1.5                 | 48.5             | 236  | C9H6O4       | Daphnetin                       | --                                                |                           |
| 17  | 6.34        | 355.10237         | -0.4                | 100              | 37856 | 353.0878          | 0.9                 | 99.9             | 2454 | C16H18O9     | Chlorogenic acid                | --                                                | Phenolic acid             |

|    |       |           |      |      |        |          |     |      |       |               |                                          |                                                                                                       |                       |
|----|-------|-----------|------|------|--------|----------|-----|------|-------|---------------|------------------------------------------|-------------------------------------------------------------------------------------------------------|-----------------------|
| 18 | 10.82 | 183.06518 | -1   | 62.9 | 1443   | --       | --  | --   | --    | C9H10O4       | Syringaldehyde                           | 3,4-Dimethoxybenzoic acid,<br>Homovanillic acid                                                       | other                 |
| 19 | 11.45 | --        | --   | --   | --     | 403.1246 | 0.8 | 65.6 | 177   | C17H24O11     | Gardenoside                              | sweroside +HCOOH                                                                                      | Monoterpene glycoside |
| 20 | 11.94 | 623.19703 | -0.2 | 32.2 | 463    | --       | --  | --   | --    | C29H34O15     | Pectolarin                               | --                                                                                                    | Flavonoid glycoside   |
| 21 | 12.22 | --        | --   | --   | --     | 593.1512 | 4   | 35.4 | 452   | C27H30O15     | Glucosylvitexin                          | Aempferol-3-O-rutinoside,<br>Oroxin B                                                                 | Flavonoid glycoside   |
| 22 | 12.22 | --        | --   | --   | --     | 389.1453 | 0.5 | 48.9 | 287   | C17H26O10     | Loganin                                  | --                                                                                                    | Monoterpene glycoside |
| 23 | 14.2  | 149.0961  | -0.7 | 48.6 | 1590   | --       | --  | --   | --    | C10H12O       | Anise oil                                | --                                                                                                    | other                 |
| 24 | 14.32 | 700.28114 | -1.3 | 99.2 | 5145   | --       | --  | --   | --    | C32H42O16.NH3 | Pinoresinol Diglucoside<br>+NH3          | --                                                                                                    | Diterpene glycoside   |
| 25 | 15.4  | 273.07576 | -0.6 | 96.2 | 1835   | --       | --  | --   | --    | C15H12O5      | Naringenin                               | --                                                                                                    | Flavonoid             |
| 26 | 15.83 | 565.15516 | -0.9 | 98.3 | 17364  | 563.1406 | 4.6 | 99.4 | 427   | C26H28O14     | Schaftoside                              | Isoschaftoside                                                                                        | Flavonoid glycoside   |
| 27 | 16.62 | 419.13365 | -0.2 | 99.7 | 15576  | 417.1191 | 2.2 | 94.6 | 2916  | C21H22O9      | Liquiritin                               | --                                                                                                    | Flavonoid glycoside   |
| 28 | 21.67 | 611.16066 | 0    | 99.4 | 61425  | --       | --  | --   | --    | C27H30O16     | Rutin                                    | --                                                                                                    | Flavonoid glycoside   |
| 29 | 21.71 | 465.10277 | -0.8 | 100  | 19872  | 463.0882 | 4.4 | 99.7 | 314   | C21H20O12     | Hyperin                                  | myricitrin, Isoquercitrin                                                                             | Flavonoid glycoside   |
| 30 | 22.03 | 463.08711 | -0.6 | 100  | 31099  | 461.0726 | 3.3 | 100  | 641   | C21H18O12     | Luteolin-7-O- $\beta$ -D-<br>glucuronide | Scutellarin                                                                                           | Flavonoid glycoside   |
| 31 | 22.51 | 449.10783 | -0.3 | 100  | 16039  | --       | --  | --   | --    | C21H20O11     | Astragaln                                | Luteoloside, Quercitrin,<br>Quercetin 7-rhamnoside,<br>Cyanidin-3-O-glucoside,<br>Rhodionin, Orientin | Flavonoid glycoside   |
| 32 | 23.84 | --        | --   | --   | --     | 577.1563 | 3.3 | 47.4 | 231   | C27H30O14     | Rhoifolin                                | Kaempferitrin, Vitexin-2-O-<br>rhamnoside                                                             | Flavonoid glycoside   |
| 33 | 25.18 | --        | --   | --   | --     | 477.1403 | 4.5 | 100  | 2818  | C23H26O11     | Calceorioside B                          | --                                                                                                    | Phenylpropanoid       |
| 34 | 25.61 | 642.23927 | -1   | 84.2 | 312924 | 623.1982 | 4.8 | 95.3 | 47276 | C29H36O15.NH3 | Forsythoside A +NH3                      | --                                                                                                    | Phenylpropanoid       |
| 35 | 26.2  | 774.28151 | -0.4 | 98.8 | 12373  | --       | --  | --   | --    | C34H44O19.NH3 | Forsythoside B +NH3                      | --                                                                                                    | Phenylpropanoid       |

|    |       |           |      |      |        |          |     |      |       |                 |                                     |                                                                                    |                     |
|----|-------|-----------|------|------|--------|----------|-----|------|-------|-----------------|-------------------------------------|------------------------------------------------------------------------------------|---------------------|
| 36 | 26.52 | 303.04994 | 0.7  | 96.3 | 21822  |          |     |      |       | C15H10O7        | Quercetin dihydrate                 | Morin hydrate                                                                      | Flavonoid           |
| 37 | 26.54 | 287.05501 | -0.5 | 98.3 | 3461   | --       | --  | --   | --    | C15H10O6        | Luteolin                            | --                                                                                 | Flavonoid           |
| 38 | 26.61 | 517.13405 | -0.7 | 98.8 | 26168  | 515.1195 | 1   | 100  | 6535  | C25H24O12       | Isochlorogenic acid A               | --                                                                                 | Phenolic acid       |
| 39 | 27.56 | 433.11293 | -1   | 99.7 | 32368  | 431.0984 | 3.4 | 99   | 836   | C21H20O10       | Apigenin-7-glucoside                | Emodin-8-glucoside,<br>Isovitexin, Genistin,<br>Sophoricoside, Vitexin,<br>Afzelin | Flavonoid glycoside |
| 40 | 28.14 | 447.09218 | -1   | 99.2 | 9933   | 445.0776 | 4.8 | 99.7 | 229   | C21H18O11       | Apigenin 7-O-beta-D-<br>glucuronide | Baicalin                                                                           | Flavonoid glycoside |
| 41 | 29.12 |           |      |      |        | 441.1766 | 3.4 | 96.2 | 417   | C20H28O8.HCOOH  | Lobetyolin +HCOOH                   | --                                                                                 | other               |
| 42 | 30.78 | 611.19703 | -2   | 95.5 | 21549  |          |     |      |       | C28H34O15       | hesperidin                          | Neohesperidin, Hesperetin                                                          | Flavonoid glycoside |
| 43 | 32.55 |           |      |      |        | 359.0772 | 4.4 | 98   | 4599  | C18H16O8        | Rosmarinic acid                     | --                                                                                 | Phenolic acid       |
| 44 | 32.67 | 431.13365 | 0    | 99.3 | 66834  | --       | --  | --   | --    | C22H22O9        | Ononin                              | --                                                                                 | Flavonoid glycoside |
| 45 | 33.11 | 255.06518 | -0.9 | 85.6 | 3536   |          |     |      |       | C15H10O4        | Chrysin                             | Daidzein, Chrysophanol                                                             | Flavonoid           |
| 46 | 33.23 | 463.12349 | -0.3 | 96.9 | 13513  | --       | --  | --   | --    | C22H22O11       | Pratensein-7-O-glucoside            | Daidzin +HCOOH,<br>Tectoridin                                                      | Flavonoid glycoside |
| 47 | 34.35 | 289.07066 | -0.5 | 89.8 | 1038   |          |     |      |       | C15H12O6        | Eriodictyol                         | --                                                                                 | Flavonoid           |
| 48 | 35.15 | 287.09141 | -0.4 | 46.4 | 6883   | --       | --  | --   | --    | C16H14O5        | Kaempferol                          | --                                                                                 | Flavonoid           |
| 49 | 35.4  | 257.08082 | 0.8  | 93.5 | 68154  |          |     |      |       | C15H12O4        | Liquiritigenin                      | --                                                                                 | Flavonoid           |
| 50 | 39.68 | 285.07576 | -0.8 | 85.7 | 9643   | --       | --  | --   | --    | C16H12O5        | Calycosin                           | Physcion, Wogonin,<br>Genkwanin, Acacetin                                          | Flavonoid           |
| 51 | 40.29 | 552.24391 | -0.7 | 41   | 540118 | --       | --  | --   | --    | C27H34O11.NH3   | arctiin +NH3                        | --                                                                                 | Phenylpropanoid     |
| 52 | 40.55 | --        | --   | --   | --     | 579.2085 | 0.5 | 100  | 16863 | C27H34O11.HCOOH | Phillyrin\Forsythin<br>+HCOOH       | --                                                                                 | Phenylpropanoid     |
| 53 | 41.86 | 593.18648 | -1   | 99.5 | 32005  | --       | --  | --   | --    | C28H32O14       | linarin                             | --                                                                                 | Flavonoid glycoside |
| 54 | 42.07 | 447.12858 | -0.5 | 99.4 | 29095  | --       | --  | --   | --    | C22H22O10       | Glycitin                            | calycosin-7-o-glucoside                                                            | Flavonoid glycoside |

|    |       |           |      |      |        |    |    |    |    |           |                   |                              |                     |
|----|-------|-----------|------|------|--------|----|----|----|----|-----------|-------------------|------------------------------|---------------------|
| 55 | 42.41 | 331.08122 | -0.1 | 39.1 | 4057   | -- | -- | -- | -- | C17H14O7  | Aurantio-obtusin  | --                           | Anthraquinone       |
| 56 | 42.49 | 271.0601  | 0.4  | 90.5 | 395    | -- | -- | -- | -- | C15H10O5  | Emodin            | --                           | Anthraquinone       |
| 57 | 42.84 | 247.0601  | -0.7 | 94   | 351    | -- | -- | -- | -- | C13H10O5  | Isopimpinellin    | --                           | Coumarin            |
| 58 | 43.28 | 153.12739 | -3   | 65.3 | 3593   | -- | -- | -- | -- | C10H16O   | Pulegone          | --                           | Monoterpene         |
| 59 | 43.94 | 345.09688 | 0.5  | 90   | 1097   | -- | -- | -- | -- | C18H16O7  | Eupatilin         | Usnic acid, Lysionotin       | Flavonoid glycoside |
| 60 | 44.26 | 269.08082 | 0.4  | 91   | 17010  | -- | -- | -- | -- | C16H12O4  | Formononetin      | --                           | Flavonoid           |
| 61 | 44.41 | 373.16456 | -0.7 | 34.1 | 5470   | -- | -- | -- | -- | C21H24O6  | Arctigenin        | --                           | Phenylpropanoid     |
| 62 | 46.52 | 315.08632 | -0.4 | 75.5 | 2788   | -- | -- | -- | -- | C17H14O6  | Pectolinarigenin  | --                           | Flavonoid           |
| 63 | 48.08 | 375.10744 | 0    | 87.4 | 18921  | -- | -- | -- | -- | C19H18O8  | Chrysosplenetin B | vitexicarpin                 | Flavonoid           |
| 64 | 48.46 | 403.13875 | -0.3 | 95   | 33677  | -- | -- | -- | -- | C21H22O8  | Nobiletin         | --                           | Flavonoid           |
| 65 | 48.61 | 823.41109 | -0.7 | 99.8 | 100668 | -- | -- | -- | -- | C42H62O16 | Glycyrrhizic acid | --                           | Triterpene saponins |
| 66 | 51.43 | 457.36763 | -0.9 | 54.7 | 1123   | -- | -- | -- | -- | C30H48O3  | Betulinic acid    | Ursolic Acid, Oleanolic acid | Triterpene          |
| 67 | 51.47 | 322.10737 | 0.8  | 85.9 | 6004   | -- | -- | -- | -- | C19H15NO4 | Berberubine       | --                           | other               |
| 68 | 51.64 | 455.35197 | -2.7 | 57.5 | 13517  | -- | -- | -- | -- | C30H46O3  | Betulonicacid     | --                           | Triterpene          |
| 69 | 51.75 | 373.12819 | 0.7  | 93.2 | 18745  | -- | -- | -- | -- | C20H20O7  | Tangeretin        | --                           | Flavonoid           |
| 70 | 52.21 | 245.11722 | -1   | 91.1 | 2652   | -- | -- | -- | -- | C15H16O3  | Osthole           | --                           | Coumarin            |

Note 1: The "--" signal means not detected or beyond the confidential level. The 7 determined compounds marked in red were verified with their reference materials. In this table, contents in the "Formula" and "Identified compound" column were both inherited from the compound library. Take the compound of NO.15 as an example, the name "Salidroside +NH3" actually means the "Salidroside + [NH4] +" adducts; and the formula "C14H20O7.NH3" actually means "C14H20O7.NH4". In TCM compounds, some glycosides have intensive tendencies to form the ammonium adducts rather than proton adducts. Although we did not add ammonium to the eluent, the ammonium ion may be brought in by the solvent system.

**Table S2.** The fingerprint technical parameters of 49 common peaks.

| No. | Retention time<br>/min | Relative retention<br>time | Peak Area          | Relative Peak Area | Peak Area RSD (%) | Peak identification |
|-----|------------------------|----------------------------|--------------------|--------------------|-------------------|---------------------|
| 1   | 1.733                  | 0.070                      | 499464.9±63345.75  | 0.218±0.026        | 12.68             |                     |
| 2   | 2.087                  | 0.084                      | 690488.7±55953.35  | 0.303±0.028        | 8.10              |                     |
| 3   | 2.444                  | 0.098                      | 509525.4±85193.04  | 0.223±0.034        | 16.72             |                     |
| 4   | 2.963                  | 0.119                      | 1569795.5±221970.4 | 0.687±0.096        | 14.14             |                     |
| 5   | 3.240                  | 0.130                      | 369957.3±30202.25  | 0.162±0.011        | 8.16              |                     |
| 6   | 3.601                  | 0.145                      | 359016.5±20399.48  | 0.157±0.009        | 5.68              |                     |
| 7   | 3.999                  | 0.161                      | 36282.4±9448.53    | 0.016±0.004        | 26.04             |                     |
| 8   | 4.806                  | 0.193                      | 83637.8±21243.45   | 0.036±0.009        | 25.40             |                     |
| 9   | 5.363                  | 0.216                      | 83792.2±25526.88   | 0.037±0.011        | 30.46             |                     |
| 10  | 5.803                  | 0.234                      | 128320.4±21772.68  | 0.056±0.011        | 16.97             |                     |
| 11  | 6.834                  | 0.275                      | 909965.1±95027.7   | 0.397±0.031        | 10.44             |                     |
| 12  | 7.490                  | 0.302                      | 192864.1±10350.03  | 0.084±0.005        | 5.37              | Chlorogenic acid    |
| 13  | 8.340                  | 0.336                      | 41680.6±7039.46    | 0.018±0.003        | 16.89             |                     |
| 14  | 9.473                  | 0.381                      | 629761.7±57728.37  | 0.276±0.024        | 9.17              |                     |
| 15  | 10.065                 | 0.405                      | 275298.9±39392.39  | 0.120±0.016        | 14.31             |                     |
| 16  | 10.413                 | 0.419                      | 398811.5±109365.4  | 0.174±0.044        | 27.42             |                     |
| 17  | 10.962                 | 0.441                      | 477615.3±86745.12  | 0.208±0.034        | 18.16             |                     |
| 18  | 11.368                 | 0.458                      | 123989.6±39434.37  | 0.054±0.016        | 31.80             |                     |
| 19  | 11.557                 | 0.465                      | 108652.7±22113.71  | 0.047±0.009        | 20.35             |                     |
| 20  | 11.940                 | 0.481                      | 4319730.5±341679   | 1.892±0.169        | 7.91              |                     |
| 21  | 13.233                 | 0.533                      | 66713.6±10347.49   | 0.029±0.005        | 15.51             |                     |
| 22  | 16.136                 | 0.650                      | 220119.1±52432.55  | 0.096±0.021        | 23.82             | Liquiritin          |

|    |        |       |                    |             |       |                       |
|----|--------|-------|--------------------|-------------|-------|-----------------------|
| 23 | 16.889 | 0.680 | 77168.9±5583.51    | 0.034±0.002 | 7.24  |                       |
| 24 | 18.403 | 0.741 | 93078.2±36909.59   | 0.041±0.015 | 39.65 |                       |
| 25 | 18.889 | 0.760 | 2125304.6±119502.9 | 0.929±0.020 | 5.62  |                       |
| 26 | 19.766 | 0.796 | 114610.9±17207.57  | 0.050±0.008 | 15.01 |                       |
| 27 | 21.091 | 0.849 | 502702.9±35440.68  | 0.220±0.008 | 7.05  | Rutin                 |
| 28 | 22.149 | 0.892 | 72667.6±20247.45   | 0.032±0.009 | 27.86 |                       |
| 29 | 22.673 | 0.913 | 440705.4±53027.2   | 0.193±0.024 | 12.03 |                       |
| 30 | 23.031 | 0.927 | 73845.8±49504.29   | 0.032±0.021 | 67.04 |                       |
| 31 | 23.816 | 0.959 | 3069796.5±232043.4 | 1.342±0.069 | 7.56  |                       |
| 32 | 24.35  | 0.980 | 183898.1±66353.52  | 0.081±0.028 | 36.08 |                       |
| 33 | 24.839 | 1.000 | 2287000.1±102839.4 | 1.000±0.000 | 4.50  | Forsythoside A        |
| 34 | 25.992 | 1.046 | 369022.1±127531.2  | 0.160±0.050 | 34.56 | Isochlorogenic acid A |
| 35 | 27.059 | 1.089 | 9754567.9±185277.2 | 4.272±0.175 | 1.90  |                       |
| 36 | 31.311 | 1.261 | 101198.5±69506.52  | 0.044±0.029 | 68.68 |                       |
| 37 | 31.792 | 1.280 | 52480.9±13009.09   | 0.023±0.005 | 24.79 |                       |
| 38 | 32.376 | 1.303 | 234826.9±48326.21  | 0.102±0.018 | 20.58 |                       |
| 39 | 33.558 | 1.351 | 263980.6±22472.54  | 0.115±0.008 | 8.51  |                       |
| 40 | 38.960 | 1.569 | 179087.2±13675.97  | 0.078±0.006 | 7.64  | Forsythin             |
| 41 | 41.841 | 1.684 | 6215596.5±376617.6 | 2.726±0.250 | 6.06  |                       |
| 42 | 43.308 | 1.744 | 236365.6±33869.87  | 0.103±0.014 | 14.33 |                       |
| 43 | 44.963 | 1.810 | 108794.1±31980.54  | 0.048±0.013 | 29.4  |                       |
| 44 | 46.509 | 1.872 | 78226.1±30500.72   | 0.034±0.013 | 38.99 |                       |
| 45 | 47.082 | 1.895 | 27981.6±7973.32    | 0.012±0.003 | 28.49 |                       |
| 46 | 47.84  | 1.926 | 763361.5±251866.8  | 0.333±0.104 | 32.99 | Glycyrrhizic acid     |
| 47 | 51.538 | 2.075 | 271272.2±68569.16  | 0.119±0.028 | 25.28 |                       |
| 48 | 52.656 | 2.120 | 162106.8±19050.67  | 0.071±0.007 | 11.75 |                       |

|    |        |       |                 |             |      |
|----|--------|-------|-----------------|-------------|------|
| 49 | 53.267 | 2.144 | 54907.8±3559.47 | 0.024±0.001 | 6.48 |
|----|--------|-------|-----------------|-------------|------|

Note: Forsythoside A is selected as internal referring substance. Peak area data are showed as Mean ± SD (n=15)

**Table S3.** Peak areas of seven determined characteristic peaks.

| No.      | Peak Area of Seven Characteristic Peaks |            |        |                |                       |           |                   |
|----------|-----------------------------------------|------------|--------|----------------|-----------------------|-----------|-------------------|
|          | Chlorogenic acid                        | Liquiritin | Rutin  | Forsythoside A | Isochlorogenic acid A | Forsythin | Glycyrrhizic acid |
| S1       | 196073                                  | 185853     | 456786 | 2773590        | 2164644               | 179173    | 598046            |
| S2       | 204644                                  | 189657     | 461382 | 2798250        | 2182897               | 178768    | 596304            |
| S3       | 190834                                  | 171477     | 459600 | 2673302        | 2111794               | 180417    | 560860            |
| S4       | 185382                                  | 167141     | 456291 | 2785827        | 2138218               | 186709    | 561084            |
| S5       | 205851                                  | 185282     | 546245 | 3077614        | 2357087               | 181314    | 600715            |
| S6       | 202537                                  | 182657     | 547892 | 3415166        | 2351951               | 185224    | 602931            |
| S7       | 192710                                  | 185056     | 528560 | 3408203        | 2348199               | 196443    | 599253            |
| S8       | 204679                                  | 200351     | 540035 | 3381807        | 2361915               | 199336    | 598264            |
| S9       | 197424                                  | 185367     | 533278 | 3184572        | 2404242               | 192863    | 604548            |
| S10      | 200825                                  | 196679     | 542989 | 3160885        | 2372919               | 181769    | 604517            |
| S11      | 191209                                  | 297988     | 501556 | 3081322        | 2378652               | 174575    | 1147331           |
| S12      | 181364                                  | 296062     | 503039 | 3045850        | 2377288               | 175365    | 1143579           |
| S13      | 189877                                  | 301076     | 606171 | 3085141        | 2330675               | 159879    | 1139668           |
| S14      | 176542                                  | 277747     | 478155 | 3076948        | 2221574               | 168405    | 1046988           |
| S15      | 173009                                  | 279392     | 478562 | 3098472        | 2202945               | 146066    | 1046333           |
| C.V. (%) | 5.366                                   | 23.820     | 8.719  | 7.559          | 4.497                 | 7.637     | 32.994            |

Note: C.V. means coefficient of variation.



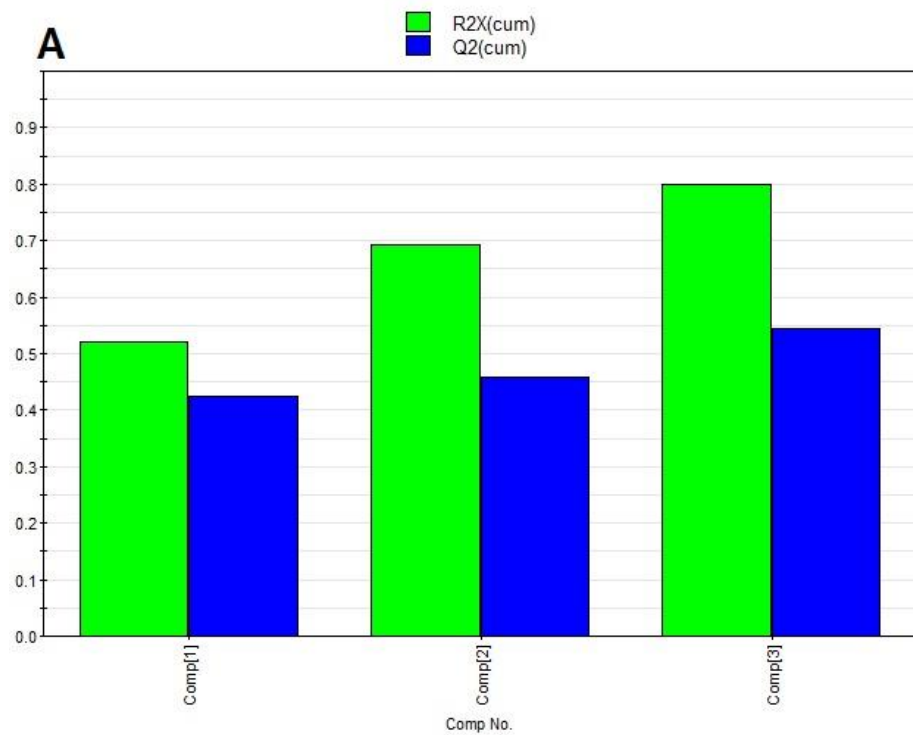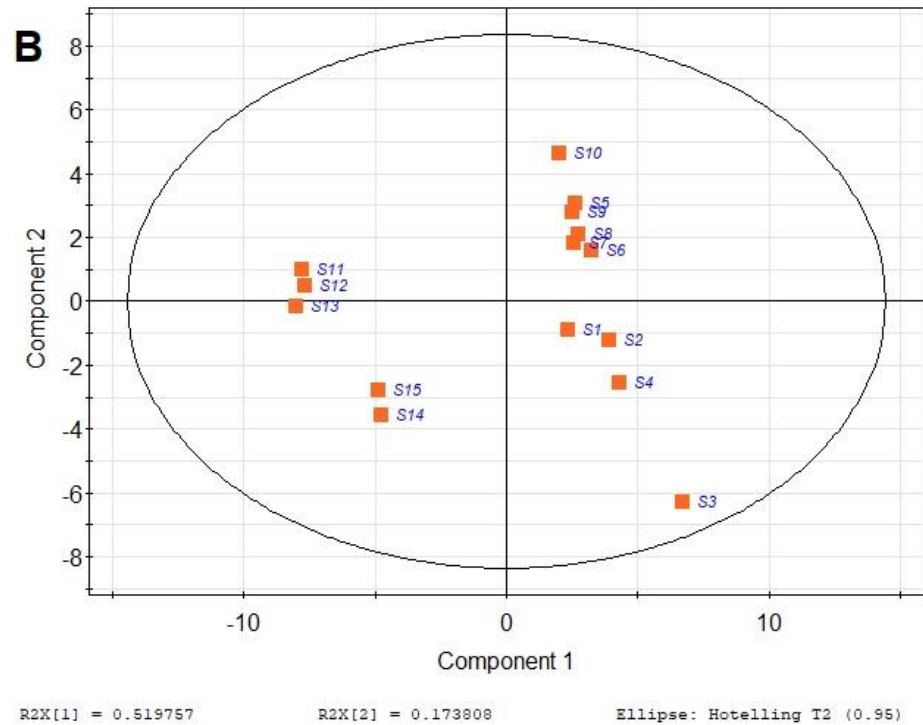

**Figure S1.** The PCA analysis of fifteen batches of samples S1-S15 based on 49 chromatographic peaks. (A) Model overview plot. Cumulated by 3 components, the R2X value is near 0.8, and the Q2 value is near 0.55. (B) Scatter plot of fifteen samples.
